# Supplementary material for: Ferroptosis-Related Long Non-Coding RNA Signature Predicts the Prognosis of Bladder Cancer
Source: Research Square preprint supplement (doi:10.21203/rs.3.rs-789594/v1), 2021-10-12
Supplement: Supplementary file 1 [file 34acec73059ef3c221332303.xlsx]

## Sheet: Sheet1
Univariate COX analysis			multivariate COX analysis
gene	HR	pvalue	gene	coef	HR	pvalue
AC010618.2	0.606（0.420-0.874）	0.00734178	AL031775.1	-0.14258	0.867（0.716-1.049 ）	0.143629
AL031775.1	0.727（0.612-0.864）	0.000289256	AC024060.2	-0.0669749	0.935（0.880-0.994）	0.0313348
AC024060.2	0.900（0.856-0.946）	3.92e-05	AC018653.3	-0.22584	0.798（0.666-0.956）	0.0142467
AC018653.3	0.789（0.661-0.943）	0.0092711	AC011468.1	-0.105421	0.900（0.793-1.021）	0.101888
AC011468.1	0.814（0.726-0.913）	0.000435382	AL583785.1	0.0637548	1.066（1.012-1.122）	0.0156779
LINC02604	0.904（0.848-0.963）	0.0016968	AC021321.1	-0.561403	0.570（0.325-1.000）	0.0499314
AC087741.1	0.767（0.660-0.892）	0.000560675	AP003352.1	-0.0738028	0.929（0.848-1.018）	0.113514
Z84485.1	0.472（0.285-0.781）	0.00351511	`ETV7-AS1`	-0.590732	0.554（0.377-0.813）	0.0025748
AL158063.1	0.443（0.266-0.737）	0.00172258	U47924.1	0.53115	1.701（1.064-2.720）	0.0265388
THUMPD3-AS1	0.852（0.772-0.940）	0.00142971	AC010326.3	0.0458607	1.047（0.989-1.109）	0.117773
AC245884.8	0.741（0.602-0.912）	0.00464386	LINC02762	0.20534	1.228（1.112-1.356）	5.29e-05
AL583785.1	1.067（1.019-1.118）	0.00483361
AC021321.1	0.397（0.244-0.646）	0.000200712
AC010331.1	0.728（0.586-0.905）	0.00425466
AC022007.1	0.812（0.703-0.937）	0.00441193
AC005387.1	0.649（0.488-0.862）	0.00290077
AP003352.1	0.883（0.812-0.959）	0.00314784
ETV7-AS1	0.524（0.359-0.766）	0.000833546
STAG3L5P-PVRIG2P-PILRB	0.541（0.398-0.735）	8.71e-05
AC008610.1	0.864（0.776-0.962）	0.00782091
PTOV1-AS2	0.884（0.825-0.947）	0.000452515
AL731569.1	0.423（0.220-0.812）	0.0097099
U47924.1	0.586（0.390-0.879）	0.00981234
ZKSCAN2-DT	0.700（0.541-0.905）	0.00652064
ZNF32-AS1	0.656（0.483-0.891）	0.00696442
AC004076.2	0.266（0.110-0.643）	0.00330901
AC011503.2	0.812（0.699-0.943）	0.0064462
ASMTL-AS1	0.923（0.875-0.973）	0.00316301
AC097641.2	0.666（0.490-0.906）	0.00950708
AC010326.3	0.938（0.896-0.982）	0.00644873
AC004477.1	0.317（0.136-0.737）	0.00762018
AL078587.1	0.559（0.369-0.846）	0.00602695
LINC02762	1.209（1.105-1.322）	3.21e-05
AC010491.1	0.298（0.139-0.641）	0.00193068
